# Supplementary material
Source: HighWire-hosted journal article supplement (https://jnm.snmjournals.org/highwire/filestream/94059/field_highwire_adjunct_files/0/65649_Supplemental_Table.pdf)
Supplement: 65649_Supplemental_Table.pdf [file 65649_Supplemental_Table.pdf]

**Supplemental Table. Comparison and differences of fusion scores between the rigid PET/CT and nonrigid PET/CT data sets.**

| <b>Anatomical landmark</b> | <b>Rigid inspiration vs. Nonrigid inspiration</b> | <b>Rigid expiration vs. Nonrigid expiration</b> | <b>Rigid mid breath-hold vs. Nonrigid mid breath-hold</b> |
|----------------------------|---------------------------------------------------|-------------------------------------------------|-----------------------------------------------------------|
| <b>Lung apices</b>         |                                                   |                                                 |                                                           |
| Rigid                      | 2.7±0.6                                           | 3.4±0.7                                         | 3.5±0.5                                                   |
| Non-rigid                  | 3.3±0.7                                           | 3.8±0.8                                         | 3.7±0.5                                                   |
| p-value                    | <0.001                                            | 0.01                                            | 0.05                                                      |
| <b>Aortic arch</b>         |                                                   |                                                 |                                                           |
| Rigid                      | 3±0.5                                             | 3.5±0.7                                         | 3.7±0.5                                                   |
| Non-rigid                  | 3.4±0.5                                           | 3.5±0.5                                         | 3.6±0.5                                                   |
| p-value                    | 0.001                                             | 0.9                                             | 0.35                                                      |
| <b>Heart</b>               |                                                   |                                                 |                                                           |
| Rigid                      | 3.1±0.6                                           | 3.1±0.5                                         | 3.7±0.7                                                   |
| Non-rigid                  | 3.2±0.6                                           | 3.4±0.7                                         | 3.5±0.6                                                   |
| p-value                    | 0.48                                              | 0.06                                            | *0.03                                                     |
| <b>Spine</b>               |                                                   |                                                 |                                                           |
| Rigid                      | 3.3±0.7                                           | 3.5±0.5                                         | 3.5±0.7                                                   |
| Non-rigid                  | 3.3±0.7                                           | 3.5±0.6                                         | 3.4±0.6                                                   |
| p-value                    | 0.89                                              | 0.84                                            | 0.47                                                      |
| <b>Carina</b>              |                                                   |                                                 |                                                           |
| Rigid                      | 3.1±0.6                                           | 3.4±0.7                                         | 3.5±0.6                                                   |
| Non-rigid                  | 3.5±0.6                                           | 3.6±0.6                                         | 3.7±0.5                                                   |
| p-value                    | 0.01                                              | 0.04                                            | 0.01                                                      |
| <b>Sternum</b>             |                                                   |                                                 |                                                           |
| Rigid                      | 3.3±0.7                                           | 3.8±0.7                                         | 3.8±0.7                                                   |
| Non-rigid                  | 3.5±0.6                                           | 3.8±0.7                                         | 3.8±0.6                                                   |
| p-value                    | 0.02                                              | 0.9                                             | 0.8                                                       |
| <b>Diaphragm</b>           |                                                   |                                                 |                                                           |
| Rigid                      | 3±0.8                                             | 3.3±0.7                                         | 3.3±0.7                                                   |
| Non-rigid                  | 3±0.7                                             | 3.4±0.7                                         | 3.2±0.6                                                   |
| p-value                    | 0.9                                               | 0.6                                             | 0.6                                                       |
| <b>Tumor</b>               |                                                   |                                                 |                                                           |
| Rigid                      | 3±0.7                                             | 3.5±0.8                                         | 3.8±0.7                                                   |
| Non-rigid                  | 3.4±0.6                                           | 3.5±0.9                                         | 3.3±0.7                                                   |
| p-value                    | 0.01                                              | 0.9                                             | *<0.005                                                   |

\* Note better fusion alignment in the rigid mid-breath-hold group
